# Supplementary material for: Increased Frequency of Copy Number Variations Revealed by Array Comparative Genomic Hybridization in the Offspring of Male Mice Exposed to Low Dose-Rate Ionizing Radiation
Source: MDPI journal article supplement (doi:10.3390/ijms222212437), 2021-11-18
Supplement: s1 [file s1]

Supplementary Materials

**Table S1.** List of confirmed *de novo* CNVs in the mice with 4 or more CNVs<sup>a</sup>

|                | F1 mouse |   | No. of positive probes |               | Size (bp) | Chromosomal location (GRCm38)  | qPCR probe location (GRCm38) | Involved genes |
|----------------|----------|---|------------------------|---------------|-----------|--------------------------------|------------------------------|----------------|
|                | ID       |   | 1st array CGH          | 2nd array CGH |           |                                |                              |                |
| Non-irradiated | 0mGyJ4   | F | 1                      | 2             | 73        | Chr7:88,505,369- 88,505,442    | 88,505,928                   |                |
|                |          |   | 1                      | 3             | 160       | Chr11:110,532,379- 11,0532,539 | 110,532,938                  |                |
|                |          |   | 1                      | 3             | 365       | Chr12:110,004,192- 110,004,557 | 110,004,551                  | Gm34667        |
|                |          |   | 1                      | 4             | 450       | Chr14:12,432,708- 12,433,158   | 12,433,267                   | Cadps          |
|                | 0mGyX5   | F | 1                      | 2             | 530       | Chr2:80,536,082- 80,536,612    | 80,536,641                   | Nckap1         |
|                |          |   | 1                      | 4             | 141       | Chr4:98,542,513- 98,542,654    | 98,543,072                   | Patj           |
|                |          |   | 1                      | 3             | 441       | Chr5:150,151,600- 150,152,041  | 150,152,158                  | Fry            |
|                |          |   | 1                      | 4             | 272       | Chr12:62,525,690- 62,525,962   | 62,526,249                   |                |
|                |          |   | 1                      | 3             | 286       | Chr18:70,118,957- 70,119,243   | 70,119,516                   | Rab27b         |
| Irradiated     | 20mGyA2  | M | 1                      | 4             | 528       | Chr2:126,675,275- 126,675,803  | 126,675,329                  | Gabpb1         |
|                |          |   | 1                      | 2             | 291       | Chr3:116,060,017- 116,060,308  | 116,060,058                  |                |
|                |          |   | 1                      | 3             | 168       | Chr4:54,364,673- 54,364,841    | 54,364,623                   |                |
|                |          |   | 1                      | 2             | 90        | Chr5:66,413,774- 66,413,864    | 66,413,720                   | Apbb2          |
|                |          |   | 1                      | 2             | 121       | Chr5:106,457,893- 106,458,014  | 106,457,697                  | Barhl2         |
|                |          |   | 1                      | 5             | 148       | Chr6:119,015,158- 119,015,306  | 119,015,450                  | Cacna1c        |
|                |          |   | 1                      | 5             | 314       | Chr9:33,727,971- 33,728,285    | 33,727,971                   |                |
|                |          |   | 1                      | 2             | 456       | Chr11:45,348,967- 45,349,423   | 45,349,026                   |                |
|                |          |   | 1                      | 5             | 359       | Chr12:88,993,149- 88,993,508   | 88,993,208                   |                |
|                |          |   | 1                      | 2             | 157       | Chr15:48,822,820- 48,822,977   | 48,822,836                   |                |
|                |          |   | 1                      | 2             | 107       | Chr16:8,739,256- 8,739,363     | 8,739,312                    | Usp7           |
|                | 20mGyF6  | F | 1                      | 2             | 77        | Chr1:65,305,078- 65,305,155    | 65,304,754                   | Pth2r          |
|                |          |   | 1                      | 2             | 84        | Chr2:112,492,752- 112,492,836  | 112,492,703                  |                |
|                |          |   | 1                      | 2             | 77        | Chr3:118,562,885- 118,562,962  | 118,562,833                  | Dpyd           |
|                |          |   | 1                      | 3             | 153       | Chr6:140,327,244- 140,327,397  | 140,327,079                  |                |
|                |          |   | 1                      | 10            | 1564      | Chr9:80,228,807- 80,230,371    | 38,580,367                   | Myo6           |
|                | 20mGyL1  | M | 1                      | 2             | 305       | Chr7:76,635,556- 76,635,861    | 76,635,843                   | Agbl1          |
|                |          |   | 1                      | 3             | 409       | Chr9:91,348,471- 91,348,880    | 91,348,502                   |                |
|                |          |   | 1                      | 2             | 131       | Chr13:98,143,375- 98,143,506   | 98,143,382                   | Arhgef28       |

|  |  |  |   |   |     |                              |          |      |
|--|--|--|---|---|-----|------------------------------|----------|------|
|  |  |  | 1 | 2 | 440 | Chr15:62,156,950- 62,157,390 | 62157009 | Pvt1 |
|--|--|--|---|---|-----|------------------------------|----------|------|

<sup>a</sup>Only deletions were found in these mice.
